# Supplementary material for: Extraction of Bioactive Compounds from Cistus creticus Leaves and Their Use in the Preparation of Yogurt Desserts
Source: MDPI journal article supplement (doi:10.3390/oxygen4010005), 2024-02-12
Supplement: s1 [file s1]

## Extraction of bioactive compounds from *Cistus creticus* leaves and use for preparation of yogurt desserts

Dimitrios Palaogiannis, Vassilis Athanasiadis, Theodoros Chatzimitakos, Martha Mantiniotou, Eleni Bozinou, Dimitris P. Makris and Stavros I. Lalas \*

Department of Food Science and Nutrition, University of Thessaly, Terma N. Temponera Street, 43100 Karditsa, Greece; dipaleog@med.uth.gr (D.P.); vaathanasiadis@uth.gr (V.A.); tchatzimitakos@uth.gr (T.C.); mmantiniotou@uth.gr (M.M.); empozinou@uth.gr (E.B.); dimitrismakris@uth.gr (D.P.M.)

\* Correspondence: slalas@uth.gr; Tel.: +30-24410-64783

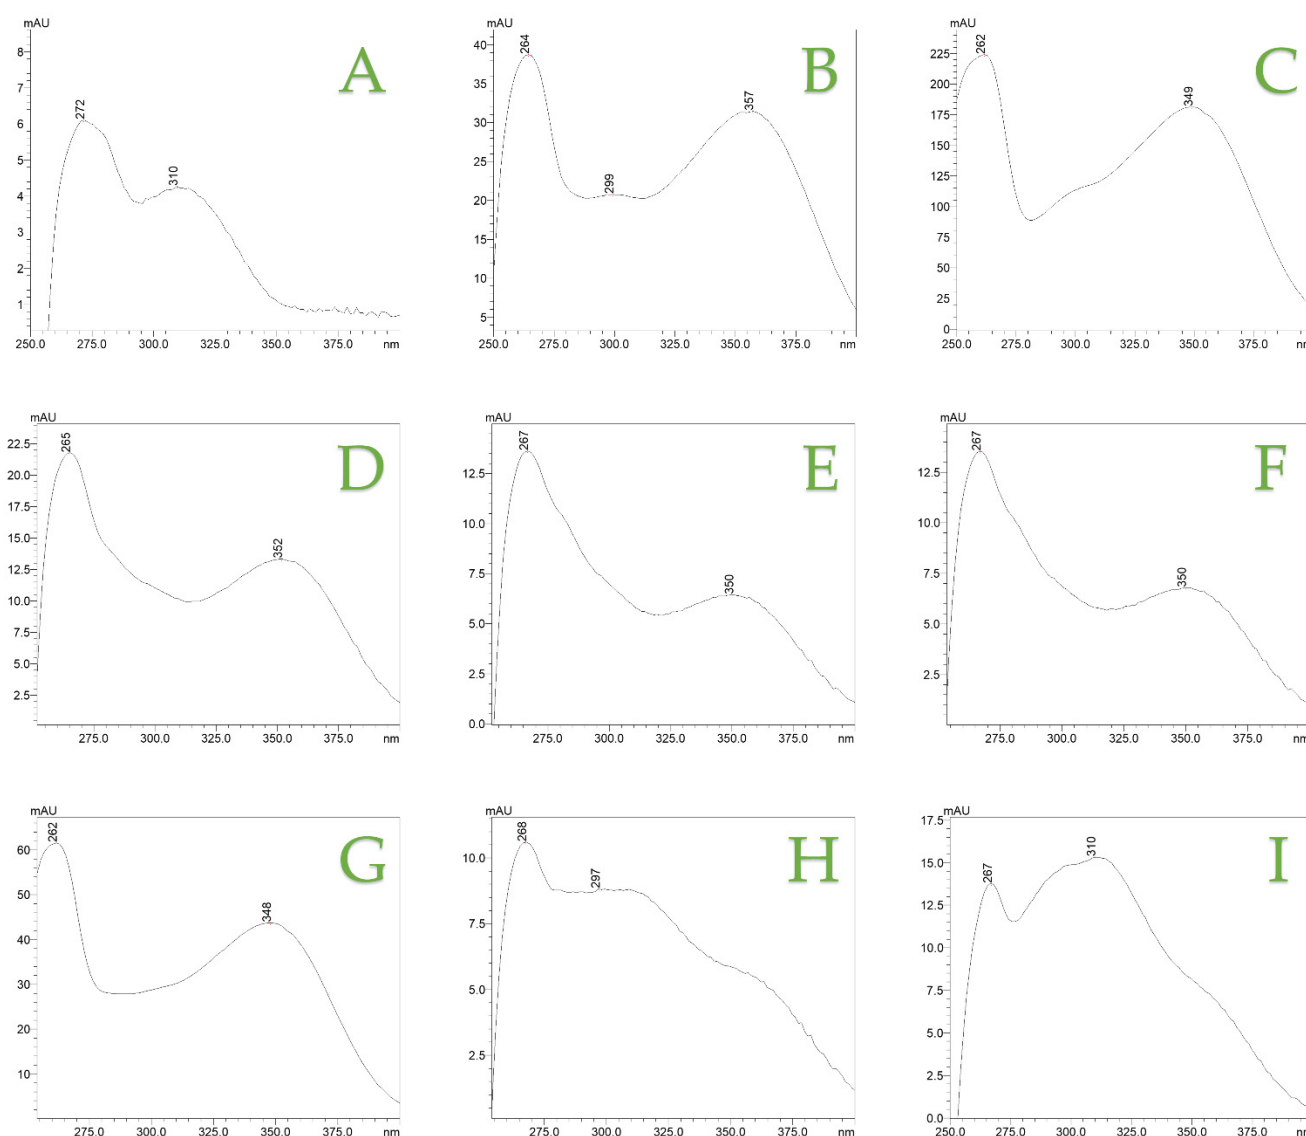

**Figure S1.** Spectral data for each identified compound, including the maximum wavelength; **A:** Luteolin glucoside derivative, **B:** 1\_Myricetin glucoside derivative, **C:** Myricetin rhamnoside, **D:** 1\_Quercetin glucoside derivative, **E:** Rutin, **F:** 2\_Quercetin glucoside derivative, **G:** Quercetin rhamnoside derivative, **H:** 2\_Myricetin glucoside derivative, **I:** Luteolin 7-(2''-p-coumaroylglucoside).
